# Supplementary material for: Novel CNT Supported Molybdenum Catalyst for Detection of L-Cysteine in Its Natural Environment
Source: MDPI journal article supplement (doi:10.3390/catal11121561), 2021-12-20
Supplement: s1 [file s1]

Archive with 1 entries (1 files):
- catalysts-1421833-supplementary.pdf
